# Supplementary material for: Superoxide Dismutase Mimetic Avasopasem Manganese Enhances Radiation Therapy Effectiveness in Soft Tissue Sarcomas and Accelerates Wound Healing
Source: MDPI journal article supplement (doi:10.3390/antiox13050587), 2024-05-10
Supplement: s1 [file s1]

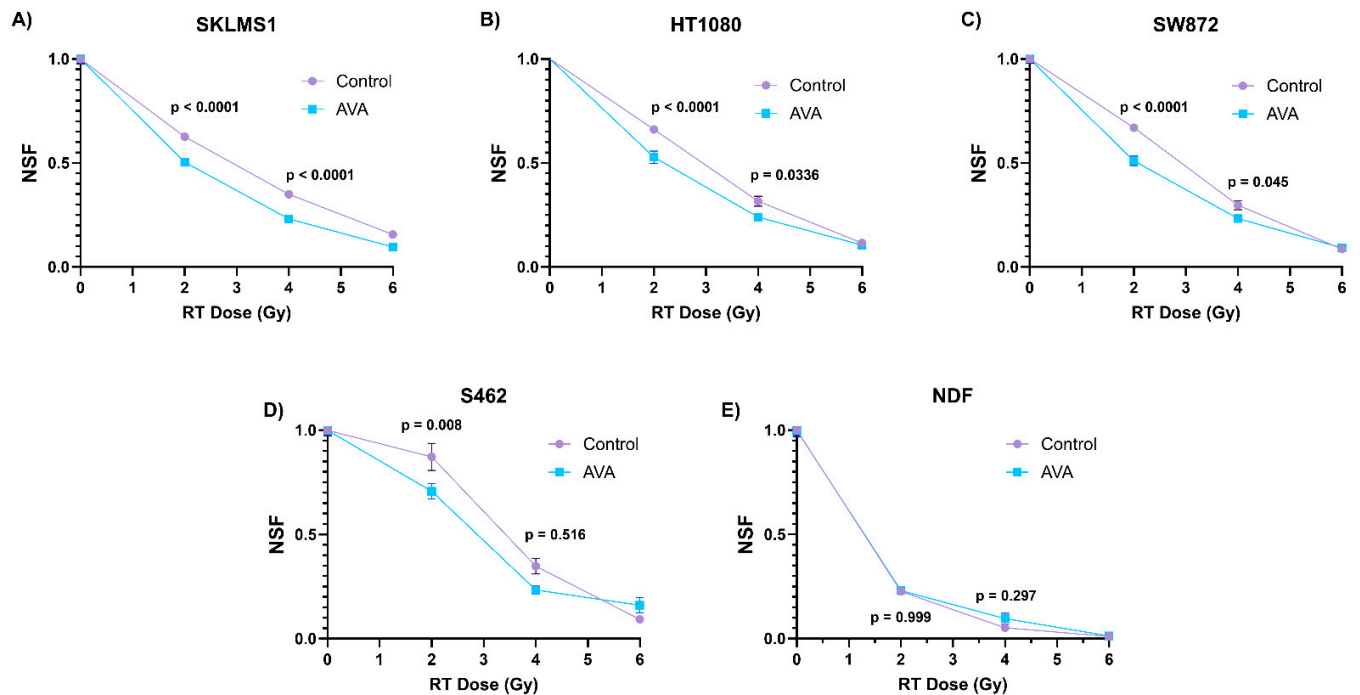

**Figure S1.** Normalized survival fraction (NSF) in SKLMS1 leiomyosarcoma (A), HT1080 fibrosarcoma cells (B), SW872 liposarcoma cells (C), S462 MPNST cells (D), and Normal dermal fibroblasts (NDFs) (E) treated with 0, 2, 4, and 6 Gy or radiation  $\pm$  AVA. N = 3.  $p \leq 0.05$  is statistically significant.

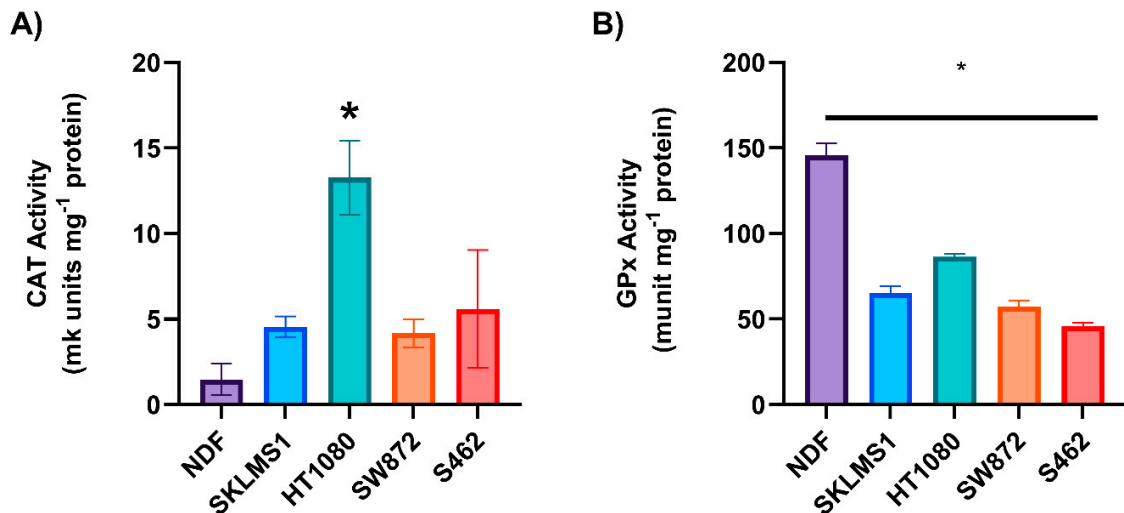

**Figure S2.** Catalase (CAT) and glutathione peroxidase 1 (GPx1) activity in sarcomas and NDFs. (A) CAT activity in NDFs, SKLMS1, HT1080, SW872, and S462 ( $\text{mk units mg}^{-1}$  protein). (B) GPx1 activity in NDFs, SKLMS1, HT1080, SW872, and S462 ( $\text{munit mg}^{-1}$  protein). N = 3. \*  $p \geq 0.05$ , statistically significant.
